# Supplementary material for: Improvement in Muscle Fatty Acid Bioavailability and Volatile Flavor in Tilapia by Dietary α-Linolenic Acid Nutrition Strategy
Source: MDPI journal article supplement (doi:10.3390/foods13071005), 2024-03-26
Supplement: s1 [file s1]

**Table S1.** Formulation and composition of the different experimental diets.

| Diets                                             | SO    | BO    |
|---------------------------------------------------|-------|-------|
| Formulation (%)                                   |       |       |
| Rapeseed meal                                     | 24    | 24    |
| Soybean meal                                      | 40    | 40    |
| Flour                                             | 16    | 16    |
| Soybean oil <sup>a</sup>                          | 9     | /     |
| Blend oil <sup>a</sup>                            | /     | 9     |
| Microcrystalline cellulose                        | 6.75  | 6.75  |
| Monocalcium phosphate                             | 2.0   | 2.0   |
| Choline chloride                                  | 0.4   | 0.4   |
| Premix <sup>b</sup>                               | 1     | 1     |
| L-methionine                                      | 0.35  | 0.35  |
| Yeast extract                                     | 0.50  | 0.50  |
| Proximate composition (%)                         |       |       |
| Dry matter                                        | 90.78 | 91.00 |
| Crude protein                                     | 32.35 | 33.41 |
| Crude lipid                                       | 8.07  | 8.93  |
| Crude ash                                         | 10.09 | 10.35 |
| Main fatty acid composition (% total fatty acids) |       |       |
| 16:0                                              | 10.93 | 10.48 |
| 18:0                                              | 4.52  | 4.25  |
| 20:0                                              | 0.46  | 0.66  |
| 16:1                                              | 2.71  | 0.23  |
| 18:1                                              | 25.9  | 26.91 |
| 20:1                                              | 0.67  | 0.44  |
| 18:2n6 (LA)                                       | 55.45 | 42.85 |
| 18:3n3 (ALA)                                      | 6.55  | 13.56 |
| LA/ALA                                            | 8.47  | 3.15  |

<sup>a</sup>Consists of soybean oil and linseed oil with proper proportions. Soybean oil contained 51.57% LA and 6.50% ALA, and linseed oil contained 16.3% LA and 47.44% ALA.

<sup>b</sup>Premix supplied the following minerals and/or vitamins (per kg of premix): Fe, 10 g; Zn, 3.2 g; Mn, 3 g; Co, 52 mg; iodine, 65 mg; Se, 15 mg; vitamin A, 3.3 mg; vitamin D<sub>3</sub>, 0.08 mg; vitamin E, 307 mg; vitamin K<sub>3</sub>, 1000 mg; vitamin B<sub>1</sub>, 1500 mg; vitamin B<sub>2</sub>, 2800 mg; vitamin B<sub>6</sub>, 1000 mg; vitamin B<sub>12</sub>, 8 mg; d-calcium pantothenate, 2000 mg; nicotinic acid, 7800 mg; biotin, 8 mg; folic acid, 400 mg; inositol, 12,800 mg; stable vitamin C, 20,000 mg.

**Table S2** qPCR primers sequence used in this study.

| Primer name      | Primer sequence (5'-3')      | Accession number |
|------------------|------------------------------|------------------|
| Lipid oxidation  |                              |                  |
| lox5-F           | GTCTGGCAAATGTGAATTTGATC<br>G | XM_003451927     |
| lox5-R           | CGATCAAATTCACATTTGCCAGA<br>C |                  |
| lox12-F          | CTGGTCAGTTAATGCCAGTTGC       | XM_025903275     |
| lox12-R          | GGTGAGTGCGCAGCAGATGAGC       |                  |
| lox15-F          | GCACAGCAGAACACAACAGCGA       | XM_025903464     |
| lox15-R          | GATTGTGAAGTGTATCTTAATTC      |                  |
| gpx1-F           | CCAAGAGAACTGCAAGAACGA        | DQ355022.1       |
| gpx1-R           | CAGGACACGTCATTCCTACAC        |                  |
| gpx4-F           | CGCAGTGCCAAGTCCATCTATGA      | GR617156.1       |
| gpx4-R           | GCATGGGAATCCCAGGATGCGT       |                  |
| Lipid metabolism |                              |                  |
| atgl-F           | AAAACGTCCTGGTGACCCAGT        | XM_003440346     |
| atgl-R           | TAGGAGGAATGATGCCACAGTAC      |                  |

---

|                 |                          |                |
|-----------------|--------------------------|----------------|
|                 | A                        |                |
| lpl-F           | CACCAAAGTAGTGGGTCGTGATG  |                |
|                 | T                        |                |
| lpl-R           | TCCCAGACTATAACCCAGCAGAT  | NM_001279753.1 |
|                 | GA                       |                |
| dgat1-F         | GCTTGAATTCTGTCACCCTGAAG  |                |
|                 | A                        | XM_003444020.5 |
| dgat1-R         | ACCTGCTTG TAGGCGTCGTTCT  |                |
| dgat2-F         | GCTTGAATTCTGTCACCCTGAAG  |                |
|                 | A                        | XM_003458972.5 |
| dgat2-R         | ACCTGCTTG TAGGCGTCGTTCT  |                |
| fas-F           | TCATCCAGCAGTTC ACTGGCATT |                |
| fas-R           | TGATTAGGTCCACGGCCACA     | GU433188.1     |
| lpcat3-F        | TTTTCGAGTGGTGGTCAAGG     |                |
| lpcat3-R        | GCTACAACGCAGACAATCCC     | XM_005455464.4 |
| lpcat4-F        | CTGGACAGGATGATTGACAGGT   |                |
| lpcat4-R        | CACAGAGTGATCCTTGGAGT     | XM_039610017   |
| $\beta$ actin-F | CAGGATGCAGAAGGAGATCACA   |                |
| $\beta$ atcin-R | CGATCCAGACGGAGTATTTACG   | KJ126772.1     |

---

**Table S3** Fatty acid positional distribution of TAG and PL in the muscle of tilapia fed different diets.

| Main fatty acid<br>compositions (%) | SO                        |                           | BO                        |                           |
|-------------------------------------|---------------------------|---------------------------|---------------------------|---------------------------|
|                                     | sn-2                      | sn-1/3 or sn-1            | sn-2                      | sn-1/3 or sn-1            |
| TAG                                 |                           |                           |                           |                           |
| 16:0                                | 22.45 ± 0.35 <sup>a</sup> | 17.76 ± 0.36 <sup>b</sup> | 20.69 ± 0.63 <sup>a</sup> | 15.24 ± 0.43 <sup>b</sup> |
| 18:0                                | 7.02 ± 0.46 <sup>a</sup>  | 3.10 ± 0.22 <sup>b</sup>  | 5.69 ± 0.38 <sup>a</sup>  | 2.83 ± 0.12 <sup>b</sup>  |
| 16:1                                | 0.62 ± 0.15 <sup>b</sup>  | 1.48 ± 0.21 <sup>a</sup>  | 0.56 ± 0.10 <sup>b</sup>  | 1.32 ± 0.08 <sup>a</sup>  |
| 18:1                                | 18.09 ± 0.44 <sup>b</sup> | 25.20 ± 0.50 <sup>a</sup> | 15.92 ± 0.42 <sup>b</sup> | 23.75 ± 0.39 <sup>a</sup> |
| 18:2n-6 (LA)                        | 25.22 ± 0.31 <sup>b</sup> | 33.22 ± 0.61 <sup>a</sup> | 20.60 ± 0.53 <sup>c</sup> | 24.19 ± 0.21 <sup>b</sup> |
| 20:4n-6 (ARA)                       | 0.49 ± 0.02 <sup>b</sup>  | 0.85 ± 0.06 <sup>a</sup>  | 0.31 ± 0.02 <sup>b</sup>  | 0.93 ± 0.11 <sup>a</sup>  |
| 18:3n-3 (ALA)                       | 1.43 ± 0.08 <sup>d</sup>  | 4.55 ± 0.12 <sup>c</sup>  | 7.32 ± 0.06 <sup>b</sup>  | 13.36 ± 0.04 <sup>a</sup> |
| 20:5n-3 (EPA)                       | 0.44 ± 0.03 <sup>c</sup>  | 0.51 ± 0.04 <sup>bc</sup> | 0.61 ± 0.04 <sup>b</sup>  | 0.88 ± 0.03 <sup>a</sup>  |
| 22:6n-3 (DHA)                       | 6.96 ± 0.28 <sup>b</sup>  | 3.56 ± 0.14 <sup>c</sup>  | 9.75 ± 0.47 <sup>a</sup>  | 6.12 ± 0.14 <sup>b</sup>  |
| SFA                                 | 33.26 ± 1.57 <sup>a</sup> | 23.54 ± 0.48 <sup>b</sup> | 29.85 ± 1.08 <sup>a</sup> | 20.18 ± 0.61 <sup>b</sup> |
| MUFA                                | 21.80 ± 0.52 <sup>b</sup> | 29.38 ± 0.58 <sup>a</sup> | 18.28 ± 0.54 <sup>b</sup> | 27.15 ± 0.47 <sup>a</sup> |
| n-6 PUFA                            | 29.08 ± 0.40 <sup>b</sup> | 36.19 ± 0.77 <sup>a</sup> | 24.18 ± 0.59 <sup>c</sup> | 27.27 ± 0.76 <sup>b</sup> |
| n-3 PUFA                            | 9.14 ± 1.31 <sup>b</sup>  | 10.95 ± 1.08 <sup>b</sup> | 19.89 ± 1.48 <sup>a</sup> | 20.69 ± 1.24 <sup>a</sup> |
| n-3 LC-PUFA                         | 8.18 ± 0.30 <sup>b</sup>  | 4.70 ± 0.17 <sup>c</sup>  | 11.27 ± 0.50 <sup>a</sup> | 7.88 ± 0.35 <sup>b</sup>  |
| PL                                  |                           |                           |                           |                           |

|               |                           |                           |                              |                           |
|---------------|---------------------------|---------------------------|------------------------------|---------------------------|
| 16:0          | 28.45 ± 1.33 <sup>a</sup> | 20.19 ± 0.47 <sup>b</sup> | 26.53 ±<br>2.05 <sup>a</sup> | 18.02 ± 0.47 <sup>b</sup> |
| 18:0          | 12.92 ± 0.12 <sup>a</sup> | 6.04 ± 0.13 <sup>b</sup>  | 10.68 ±<br>0.27 <sup>a</sup> | 5.24 ± 0.11 <sup>b</sup>  |
| 16:1          | 1.38 ± 0.07               | 1.45 ± 0.21               | 1.31 ± 0.07                  | 1.55 ± 0.04               |
| 18:1          | 13.16 ± 0.44              | 15.63 ± 0.47              | 13.84 ± 1.81                 | 15.08 ± 0.68              |
| 18:2n-6 (LA)  | 5.98 ± 0.10 <sup>c</sup>  | 17.66 ± 2.01 <sup>a</sup> | 3.26 ± 0.07 <sup>d</sup>     | 11.10 ± 0.81 <sup>b</sup> |
| 20:4n-6 (ARA) | 6.97 ± 0.33 <sup>a</sup>  | 0.64 ± 0.07 <sup>b</sup>  | 6.22 ± 0.36 <sup>a</sup>     | 0.72 ± 0.18 <sup>b</sup>  |
| 18:3n-3 (ALA) | 0.35 ± 0.02 <sup>c</sup>  | 1.33 ± 0.03 <sup>bc</sup> | 2.52 ± 0.39 <sup>b</sup>     | 7.25 ± 0.04 <sup>a</sup>  |
| 20:5n-3 (EPA) | 1.13 ± 0.01 <sup>b</sup>  | 0.27 ± 0.03 <sup>c</sup>  | 3.57 ± 0.11 <sup>a</sup>     | 0.33 ± 0.04 <sup>c</sup>  |
| 22:6n-3 (DHA) | 14.49 ± 1.37 <sup>b</sup> | 1.31 ± 0.02 <sup>d</sup>  | 19.96 ± 1.76<br><sup>a</sup> | 4.48 ± 0.03 <sup>c</sup>  |
| SFA           | 43.59 ± 2.39 <sup>a</sup> | 30.67 ± 1.83 <sup>b</sup> | 40.54 ±<br>2.19 <sup>a</sup> | 27.34 ± 1.65 <sup>b</sup> |
| MUFA          | 15.46 ± 1.78              | 20.43 ± 1.65              | 16.04 ± 1.76                 | 19.51 ± 1.06              |
| n-6 PUFA      | 13.87 ± 1.15 <sup>c</sup> | 19.08 ± 2.44 <sup>a</sup> | 10.80 ±<br>0.40 <sup>d</sup> | 13.34 ± 1.65 <sup>b</sup> |
| n-3 PUFA      | 18.12 ± 1.58 <sup>b</sup> | 4.59 ± 0.03 <sup>d</sup>  | 28.53 ±<br>1.55 <sup>a</sup> | 12.44 ± 0.15 <sup>c</sup> |
| n-3 LC-PUFA   | 16.62 ± 2.37 <sup>b</sup> | 2.08 ± 0.01 <sup>d</sup>  | 24.66 ±<br>1.45 <sup>a</sup> | 6.01 ± 0.01 <sup>c</sup>  |

**Notes:** Values are means ± SE (n = 3) with nine fish per treatment. Values in the same row not sharing a common letter are significantly different ( $p < 0.05$ ).

**Table S4** Muscle volatile flavor compound contents of tilapia fed different diets

| Main volatile flavor compound (%)      | Dietary groups    |                   | Odor characteristics         |
|----------------------------------------|-------------------|-------------------|------------------------------|
|                                        | SO                | BO                |                              |
| Dimethyl-silanediol                    | $0.12 \pm 0.01^a$ | $0.09 \pm 0.00^b$ | Odorless                     |
| 1-Octen-3-ol                           | $0.03 \pm 0.00$   | $0.04 \pm 0.00$   | Fishy, mushroom oily odor    |
| 1-Octanol                              | $0.01 \pm 0.00^b$ | $0.03 \pm 0.00^a$ | Oily odor                    |
| Ethyl ester-hexadecanoic acid          | $0.00 \pm 0.00$   | $0.00 \pm 0.00$   | Waxy odor                    |
| Isopropyl myristate                    | $0.00 \pm 0.00^b$ | $0.01 \pm 0.00^a$ | Oily odor                    |
| 5,9-Undecadien-2-one-6,10-dimethyl-(E) | $0.01 \pm 0.00^b$ | $0.02 \pm 0.00^a$ | Floral odor                  |
| Phosphonoacetic acid                   | $0.01 \pm 0.00$   | $0.01 \pm 0.00$   | Odorless                     |
| 3-Methylsalicylic acid                 | $0.01 \pm 0.00$   | $0.01 \pm 0.00$   | Odorless                     |
| Decane                                 | $0.03 \pm 0.00$   | $0.03 \pm 0.00$   | Fruity, sweet odor           |
| 4-Methyl-decane                        | $0.01 \pm 0.00^a$ | $0.00 \pm 0.00^b$ | Pungent acrid odor           |
| 2-Methyl-decane                        | $0.01 \pm 0.00^a$ | $0.00 \pm 0.00^b$ | Pungent acrid odor           |
| 3-Methyl-decane                        | $0.02 \pm 0.00^a$ | $0.01 \pm 0.00^b$ | Pungent acrid odor           |
| Undecane                               | $0.09 \pm 0.00^a$ | $0.07 \pm 0.00^b$ | Faint odor                   |
| 3,8-Dimethyl-decane                    | $0.01 \pm 0.00^a$ | $0.00 \pm 0.00^b$ | Gasoline-like odor           |
| 2,3,5-Trimethyl-decane                 | $0.01 \pm 0.00^a$ | $0.00 \pm 0.00^b$ | Gasoline-like odor           |
| 5-Methyl-undecane                      | $0.01 \pm 0.00^a$ | $0.00 \pm 0.00^b$ | Faint odor                   |
| 3-Methyl-undecane                      | $0.02 \pm 0.00$   | $0.02 \pm 0.00$   | Faint odor                   |
| Dodecane                               | $0.03 \pm 0.00^a$ | $0.02 \pm 0.00$   | Oily odor                    |
| 3-Methyl-tridecane                     | $0.01 \pm 0.00$   | $0.01 \pm 0.00$   | Gasoline-like odor           |
| Tetradecane                            | $0.01 \pm 0.00$   | $0.01 \pm 0.00$   | Waxy odor                    |
| Pentadecane                            | $0.01 \pm 0.00$   | $0.01 \pm 0.00$   | Waxy odor                    |
| Hexadecane                             | $0.01 \pm 0.00^a$ | $0.00 \pm 0.00^b$ | Waxy odor                    |
| Heptadecane                            | $0.01 \pm 0.00$   | $0.01 \pm 0.00$   | Odorless                     |
| 2,6,10,14-Tetramethyl-hexadecane       | $0.01 \pm 0.00^a$ | $0.00 \pm 0.00^b$ | Odorless                     |
| Nonanal                                | $0.10 \pm 0.00^b$ | $0.20 \pm 0.00^a$ | Oily, floral and fruity odor |

|                          |                   |                   |                                   |
|--------------------------|-------------------|-------------------|-----------------------------------|
| Decanal                  | $0.04 \pm 0.00^b$ | $0.08 \pm 0.00^a$ | Oily, waxy and fruity odor        |
| Dodecanal                | $0.01 \pm 0.00^b$ | $0.02 \pm 0.00^a$ | Floral and oily odor              |
| Tetradecanal             | $0.00 \pm 0.00^b$ | $0.01 \pm 0.00^a$ | Oily, waxy, fishy and fruity odor |
| Pentadecanal             | $0.01 \pm 0.00$   | $0.02 \pm 0.00^a$ | Sweet odor                        |
| Octadecanal              | $0.00 \pm 0.00$   | $0.00 \pm 0.00$   | Fruity, fishy and herbal odor     |
| 2,4-Decadienal           | $0.00 \pm 0.00$   | $0.01 \pm 0.00^a$ | Oily odor                         |
| N,N-dibutyl-formamide    | $0.02 \pm 0.00^b$ | $0.04 \pm 0.00^a$ | Fishy odor                        |
| Butylated hydroxytoluene | $0.02 \pm 0.00^a$ | $0.01 \pm 0.00$   | Odorless                          |

---

**Notes:** Values are mean  $\pm$  SE (n = 3) with nine fish per treatment. Values in the same row not sharing a common letter are significantly different ( $p < 0.05$ ). Odor characteristics are described according to the literature (Cai et al., 2021; Jones et al., 2022).
